# Supplementary material for: On the antiaromatic–aromatic–antiaromatic transition of the stacked cyclobutadiene dimer
Source: Royal Society of Chemistry journal article supplement (doi:10.1039/d3cp01350b), 2023-01-01
Supplement: d3cp01350b1.zip [file d3cp01350b1.zip]

Cite this: DOI: 00.0000/xxxxxxxxxx

### ELECTRONIC SUPPORTING INFORMATION

## On the antiaromatic-aromatic-antiaromatic transition of the stacked cyclobutadiene dimer<sup>†</sup>

Mesías Orozco-Ic,<sup>\*a</sup> and Dage Sundholm<sup>\*a</sup>

Received Date

Accepted Date

DOI: 00.0000/xxxxxxxxxx

The current-density animations near the three minima (saddle points) are shown in Current-density-video.odp. The Cartesian coordinates (in XYZ format) are given in the coordinates.zip file.

<sup>a</sup> Department of Chemistry, Faculty of Science, University of Helsinki, P.O. Box 55, A. I. Virtasen aukio 1, FIN-00014 Helsinki, Finland; E-mails: mesias.oroicoic@helsinki.fi, dage.sundholm@helsinki.fi
